# Supplementary material
Source: PubMed Central journal article supplement (PMC2802581)

**a**

1% FBS

5% FBS

15% KO Serum

DAY 10

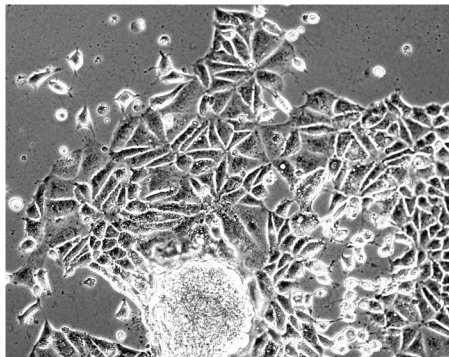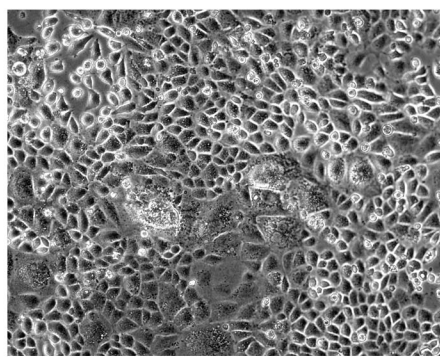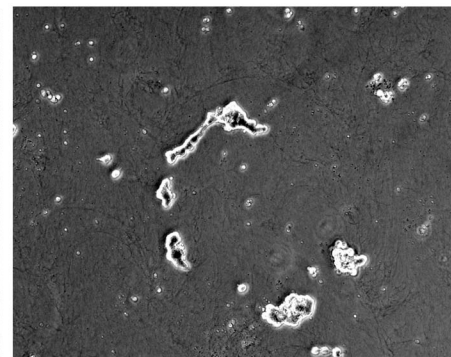**b**

1% FBS

5% FBS

10% FBS

B-Actin

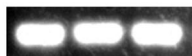

Fgf5

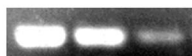

Foxa2

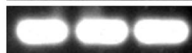

Sox 17

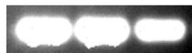

Supplement: NIHMS164188-supplement-Support.pdf [file NIHMS164188-supplement-Support.pdf]
